# Supplementary material for: Protease-Sensitive Synthetic Prions
Source: PLOS journal article supplement (doi:10.1371/journal.ppat.1000736), 2010-01-21
Supplement: S11 (10.1371/journal.ppat.1000736.s011) [file journal.ppat.1000736.s011]

**Table S5. Serial transmission of protease-sensitive synthetic prions in Tg9949 mice.<sup>a</sup>**

| <b>Inoculum</b>         | <b><i>n</i></b> | <b>Age ± S.E.<br/>(days)</b> | <b>PK<br/>resistance</b> | <b>ASA<br/>activity</b> | <b>Neuro-<br/>pathology</b> | <b>Prion<br/>disease<br/>incidence<br/>(%)</b> | <b>Resulting<br/>prion isolate</b> |
|-------------------------|-----------------|------------------------------|--------------------------|-------------------------|-----------------------------|------------------------------------------------|------------------------------------|
| None                    | 62              | 617 ± 6.5                    | 0/62                     | 0/3                     | 0/10                        | 0                                              | None                               |
| Ataxic Tg9949 Control A | 7               | 618 ± 26                     | 0/2                      | 0/2                     | 0/2                         | 0                                              | None                               |
| Ataxic Tg9949 Control B | 6               | 634 ± 49                     | 0/2                      | 0/2                     | 0/2                         | 0                                              | None                               |
| Ataxic Tg9949 Control C | 4               | 650 ± 23                     | 0/2                      | 0/2                     | 0/2                         | 0                                              | None                               |
| MoSP2-1T                | 25              | 598 ± 13                     | 0/2                      | 3/3                     | 2/2                         | 100                                            | MoSP2-2T                           |
| MoSP2-2T                | 32              | 584 ± 9.7                    | 0/2                      | 3/3                     | 2/2                         | 100                                            | MoSP2-3T                           |
| MoSP3-1T                | 12              | 589 ± 11                     | 0/2                      | 3/3                     | 2/2                         | 100                                            | MoSP3-2T                           |
| MoSP4-1T                | 15              | 559 ± 12                     | 0/2                      | 3/3                     | 2/2                         | 100                                            | MoSP4-2T                           |

<sup>a</sup> *Inocula were prepared from brain homogenates of either ataxic Tg9949 mice or Tg9949 mice containing the prion isolate indicated. Mice were inoculated at 7–10 weeks of age; n, number of ataxic/ill mice in study. For PK resistance, ASA activity, and neuropathology, the number of positive samples over the number of samples examined is reported.*
