# Supplementary material for: Protease-Sensitive Synthetic Prions
Source: PLOS journal article supplement (doi:10.1371/journal.ppat.1000736), 2010-01-21
Supplement: S13 (10.1371/journal.ppat.1000736.s013) [file journal.ppat.1000736.s013]

**Table S7. Attempted transmission of amyloid fibers to FVB mice.<sup>a</sup>**

| <b>Inoculum</b>   | <b><math>n/n_0</math></b> | <b>Mean incubation period<br/>(days <math>\pm</math> SEM)</b> | <b>p-value</b> |
|-------------------|---------------------------|---------------------------------------------------------------|----------------|
| Amyloid fibers 14 | 0/8                       | n.a.                                                          | > 0.30         |
| Amyloid fibers 15 | 4/8                       | 506 $\pm$ 46                                                  | 0.14           |
| Amyloid fibers 16 | 0/8                       | n.a.                                                          | > 0.30         |
| Amyloid fibers 17 | 0/8                       | n.a.                                                          | > 0.30         |
| Amyloid fibers 18 | 0/8                       | n.a.                                                          | > 0.30         |
| Amyloid fibers 19 | 0/8                       | n.a.                                                          | > 0.30         |
| Amyloid fibers 20 | 0/8                       | n.a.                                                          | > 0.30         |
| Amyloid fibers 21 | 1/8                       | 694                                                           | > 0.30         |
| Amyloid fibers 22 | 1/8                       | 543                                                           | > 0.30         |
| Amyloid fibers 23 | 1/8                       | 567                                                           | > 0.30         |
| Amyloid fibers 24 | 2/8                       | 650 $\pm$ 44                                                  | > 0.30         |
| Amyloid fibers 25 | 0/8                       | n.a.                                                          | > 0.30         |
| Amyloid fibers 26 | 2/8                       | 533 $\pm$ 144                                                 | > 0.30         |
| Amyloid fibers 27 | 2/8                       | 685 $\pm$ 36                                                  | > 0.30         |
| Amyloid fibers 28 | 1/8                       | 539                                                           | > 0.30         |
| Amyloid fibers 29 | 1/8                       | 455                                                           | > 0.30         |

<sup>a</sup> Mice were inoculated at 7–10 weeks of age;  $n$ , number of ill mice;  $n_0$ , number of inoculated mice. For each inoculation, mice were observed until all animals died of natural causes, exhibited neurological dysfunction, or lived for >850 d. For the cumulative incidence of neurological dysfunction, only Amyloid fibers 15 yielded a potential difference compared to BSA inoculation ( $p = 0.14$ ). However, Western blot analysis and ASA using brain tissues from the mice in this experiment did not indicate the presence of prions.
